# Supplementary material
Source: publisher figshare collection journal article supplement (https://gsajournals.figshare.com/ndownloader/files/23392556)
Supplement: Supplementary file 1 [file 23392556]

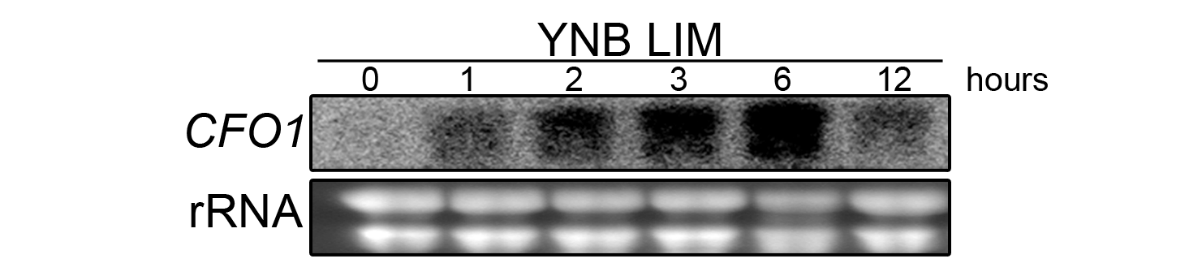


**Fig. S2.** *CFO1* transcript levels were analyzed by northern blotting to determine the time-point for cell harvesting to perform ChIP-seq. The wild-type strain was incubated in YNB low-iron medium at 30°C for the indicated times; rRNA was used as a loading control.
